# Supplementary material for: Application of Machine Learning in the Quantitative Analysis of the Surface Characteristics of Highly Abundant Cytoplasmic Proteins: Toward AI-Based Biomimetics
Source: MDPI journal article supplement (doi:10.3390/biomimetics9030162), 2024-03-06
Supplement: s1 [file s1]

## Supplementary Information

# Application of machine learning in the quantitative analysis of surface characteristics of highly abundant cytoplasmic proteins: Toward AI-based biomimetics

*Jooa Moon<sup>1</sup>, Guanghao Hu<sup>1</sup>, and Tomohiro Hayashi<sup>1,2\*</sup>*

<sup>1</sup> Department of Materials Science and Engineering, School of Materials and Chemical Technology, Tokyo Institute of Technology, 4259 Nagatsuta-cho, Midori-ku, Yokohama, Kanagawa 226-8502, Japan

<sup>2</sup> The Institute for Solid State Physics, The University of Tokyo, 5-1-5, Kashiwanoha, Kashiwa, Chiba 277-0882, Japan

\*corresponding author: tomo@mac.titech.ac.jp

### Contents:

|                                           |     |
|-------------------------------------------|-----|
| 1. List of HAC and extracellular proteins | S-1 |
| 2. Single-shot hyperparameter             | S-2 |
| 3. Statistical summary of descriptors     | S-3 |
| 4. Calculation of the surface net charge  | S-4 |

**Table S1.** List of Uniprot IDs for the HAC and extracellular proteins.

| HAC Proteins |        |        |        | Extracellular Proteins |        |        |        |
|--------------|--------|--------|--------|------------------------|--------|--------|--------|
| P51148       | P31946 | P62917 | P27348 | Q2WEN9                 | P31371 | Q12805 | P50453 |
| P22392       | Q99714 | P40429 | P62491 | Q9BTY2                 | Q6UWY2 | P09668 | Q6Q788 |
| Q9Y230       | P62258 | Q9Y3Y2 | Q9Y3I0 | P20160                 | P26022 | P61812 | P02753 |
| P05787       | P48643 | P10412 | Q07666 | P04070                 | Q8IXL6 | O95841 | O76096 |
| P12004       | P49207 | P68032 | P61604 | P43235                 | Q8N8U9 | P01037 | Q6ZMJ4 |
| P62081       | P63104 | Q15717 | O60664 | Q9Y5C1                 | P06702 | P00748 | P23510 |
| P07437       | P60866 | P62987 | P46776 | P05230                 | Q9BXJ7 | O95393 | P05019 |
| P38159       | Q01628 | P40925 | P68371 | Q9UMX5                 | Q8WWY8 | P08962 | Q8NDZ4 |
| P63241       | Q01518 | Q8WY22 | P49006 | Q8WX77                 | O95633 | Q30201 | P06858 |
| P83731       | P05141 | Q02543 | Q9BUF5 | P01619                 | P02748 | Q9Y287 | P25311 |
| Q99832       | P51991 | P37108 | Q71U36 | O15496                 | Q9H1Z8 | P01591 | P01135 |
| P62269       | Q14847 | P84090 | Q15102 | Q15046                 | P34096 | Q96HE7 | P02655 |
| P54652       | P35268 | Q15365 | Q07020 | O75718                 | P08637 | O00253 | P01588 |
| P25788       | P31943 | P84077 | P62736 | P01008                 | Q9NPH9 | P29459 | P13385 |
| Q96AE4       | P49721 | P63261 | P35998 | P00738                 | M5A8F1 | P20800 | Q6UXH8 |
| P47756       | P15311 | P42766 | P62854 | P01584                 | P28799 | P05154 | P54317 |
| P14866       | P40227 | P25398 | P08621 | P01011                 | P18065 | Q12794 | Q29983 |
| Q93077       | P62910 | P78371 | P13693 | Q9BZM5                 | Q00604 | P24387 | P20062 |
| P07737       | Q99436 | P62318 | O00299 | P35030                 | Q6P1S2 | Q08629 | P01036 |
| Q13162       | Q15005 | P12277 | P54577 | P20142                 | O15123 | P02790 | P03952 |
| O15347       | Q9Y5S9 | P35754 | Q02878 | Q9H1E1                 | O95389 | O76076 | Q9UBV4 |
| P62913       | Q15942 | P52565 | Q9Y3C6 | P14138                 | Q13253 | P08253 | P01019 |
| Q00765       | P61088 | P06454 | P06753 | P69905                 | Q96LR4 | Q9GZV9 | P13521 |
| P05114       | P62899 | Q9NPJ3 | P13489 | P17936                 | P00797 | Q9BY76 | P04141 |
| Q05639       | P62805 | P61981 | P36542 | P03950                 | P02647 | P11150 | Q08380 |
| P55084       | P62701 | P31948 | P04792 | P00734                 | Q15389 | P61626 | Q6P4A8 |
| P61254       | P32119 | Q04941 | P39023 | Q96FQ6                 | P41221 | Q15848 | O00584 |
| Q14103       | P62979 | P18124 | Q92522 | P12724                 | P08246 | P01033 | Q6UX06 |
| P46777       | P30040 | P07195 | P30041 | P09228                 | P04004 | Q969H8 | P21246 |
| P23528       | P39687 | P82979 | Q15185 | Q99988                 | P01042 | P05305 | Q6EMK4 |
| Q00325       | P68133 | Q15233 | Q9Y2T7 | P02649                 | P15309 | Q99574 | P01375 |
| Q01629       | P51571 | Q14247 | Q13148 | P56704                 | Q14116 | P00740 |        |
| P84098       | P29966 | Q9H444 | O00264 | P00749                 | Q6FHJ7 | P18428 |        |
| P0CG47       | Q9BV40 | Q16658 | P84103 | Q9BWP8                 | P55000 | Q5SY68 |        |
| P17987       | P50991 | Q16543 | P08670 | P41222                 | Q14393 | Q9UBU3 |        |
| P62829       | Q9NX24 | P06733 | P62241 | P11597                 | Q8N474 | Q96DR5 |        |
| P55769       | Q07955 | Q13509 | P26373 | P27169                 | Q96LT7 | P16519 |        |

|        |        |        |        |        |        |
|--------|--------|--------|--------|--------|--------|
| P62826 | P16402 | O14979 | Q6EBC2 | Q9BZP6 | P29460 |
| Q9NX63 | P62424 | Q15366 | P04746 | Q96HF1 | P01876 |
| P31942 | Q15056 | Q9H3N1 | P20933 | K9M1U5 | P09172 |
| P38646 | P28074 | P49773 | Q86UU9 | P02750 | P36222 |
| P61978 | P09936 | Q6FI13 | P05231 | P16233 | P05090 |
| Q15293 | Q07065 | P60709 | Q9NRS4 | P01859 | P04054 |
| P52597 | Q969M3 | O95168 | Q13790 | P07225 | P02763 |
| Q9ULV4 | Q92597 | P20671 | Q16568 | Q12846 | Q9GZN4 |
| P61204 | P11021 | P62266 | Q9BWS9 | P04085 | P09543 |
| P00558 | Q6PEY2 | P09211 | P03951 | P01857 | P19876 |
| P84243 | P60900 | P30086 | P02675 | P05121 | P08697 |
| P04844 | P17096 | P68363 | Q8TEU8 | Q9BX67 | P27352 |
| P26038 | P15531 | Q96GD0 | Q9NZK5 | P25774 | P02749 |
| P06748 | Q96QV6 | P80723 | P14174 | O75629 | P18075 |
| Q99497 | P13164 | P62879 | P22894 | P01308 | P30046 |
| P46778 | P04632 | P0DME0 | Q6UW32 | P02743 | P0DTE8 |
| P02545 | Q9NS69 | P0DP23 | Q9Y646 | Q15465 | Q8N423 |
| P50454 | P52926 | P35908 | O14791 | Q9H2A7 | Q6P5S2 |
| P55809 | P10620 | P30085 | P23280 | Q12907 | P10909 |
| P52209 | O15143 | Q9UJU6 | P29466 | Q9H3R2 | P68871 |
| Q9Y3U8 | Q01105 | Q13151 | Q8NBP7 | Q9P0G3 | Q9Y6Z7 |
| Q8NC51 | P00505 | P46783 | P43652 | Q9BT56 | P05413 |
| Q99426 | Q15084 | P16989 | O96009 | P01258 | Q9UBU2 |
| P05783 | P61353 | Q9BVA1 | Q99075 | P17405 | P01225 |
| Q02539 | P18085 | P23193 | P12273 | P01877 | P02768 |
| P68431 | P30043 | P61586 | Q7Z5A9 | Q9NRA1 | P22466 |
| P08865 | P16403 | Q9Y281 | P16581 | P05452 | P0DUB6 |
| Q99729 | Q7RTV0 | P61313 | P07711 | Q8NCC3 | O60687 |
| P62888 | P40926 | P31949 | Q99969 | P18510 | P13726 |
| P07910 | P0DPH7 | P50502 | P03971 | P02760 | P19438 |
| P47914 | P46779 | Q16695 | P09038 | P35318 | Q13287 |
| P16104 | P04075 | Q13409 | O95925 | P01009 | P11226 |
| P27824 | P22061 | P62750 | Q13231 | P40199 | P15085 |
| P52907 | P10809 | P20700 | Q9BXJ3 | Q96EG1 | Q6UY27 |
| P04406 | P00441 | P61158 | Q5W188 | P28300 | P0DTE7 |
| Q13885 | Q13247 | Q9NZZ3 | Q6X4U4 | Q15582 | P01137 |
| Q04837 | P50914 | O75083 | P06727 | P02679 | P17813 |
| P04843 | O43684 | P06576 | Q9NRJ3 | A5D8T8 | Q7Z5A8 |
| P63244 | Q562R1 | P61247 | Q7Z5A7 | Q9UBR2 | P01034 |

|        |        |        |        |        |        |
|--------|--------|--------|--------|--------|--------|
| P26368 | P38117 | P09497 | P04180 | Q6UWQ7 | P14555 |
| P05388 | P50395 | Q71DI3 | Q9BXJ1 | Q9H9S5 | Q7Z5L7 |
| P09622 | Q01130 | Q16629 | Q9Y2Y6 | O14793 | Q1L6U9 |
| P08729 | P17844 | P23526 | P08236 | P07602 | O94907 |
| P40121 | O75396 | Q9BRP8 | P07498 | O00300 | P20851 |
| Q06830 | P09651 | P49411 | Q6ZVN8 | P19652 | Q96MK3 |
| Q13185 | P63267 | P18621 | P12644 | Q9H3U7 | P31025 |
| O14828 | P13667 | P13804 | P81605 | Q9Y3A2 | P22301 |
| P04350 | P53999 | P12956 | O95388 | Q6UXB1 | Q6UX52 |
| Q01844 | Q9UKY7 | Q9Y266 | P04003 | P56705 | P07288 |
| Q03252 | Q9UKM9 | P05198 | Q13510 | Q96CG8 | P02741 |
| P14314 | P39019 | P30101 | P07858 | P05362 | P31997 |
| P36578 | P68104 | P62316 | P01583 | Q8TB73 | P41271 |
| P04264 | P15559 | P09496 | Q92484 | P10646 | P20366 |
| P00352 | P84095 | P0C0S8 | Q9Y264 | O15520 | Q5TCH4 |
| P27695 | P11142 | Q9BQE3 | O95994 | P13473 | Q9NP55 |
| P35080 | P60174 | P48735 | Q92820 | Q96QR1 | P01215 |
| P16401 | P18077 | P26599 | P04083 | P01241 | P05089 |
| Q9UBQ0 | P46781 | P00338 | P06850 | Q93091 | P03973 |
| P50990 | P16949 | P14209 | Q8TAD2 | O15537 | O14944 |
| Q99623 | P25786 | P23396 | O75356 | Q96IU2 | Q9Y5X9 |
| Q15907 | Q56VL3 | Q8IUE6 | P05814 | P0DOX3 | P40313 |
| P29373 | Q9P258 | P21796 | Q96S42 | P12643 | P08311 |
| P67936 | P28072 | P49368 | P48740 | P01871 | Q99972 |

**Table S2.** Hyperparameters of machine learning models in a single-shot trial.

| Model | Full Name                | Hyperparameters                                                                         |
|-------|--------------------------|-----------------------------------------------------------------------------------------|
| KNN   | k-Nearest Neighbors      | {'algorithm': 'auto', 'metric': 'manhattan', 'n_neighbors': 11, 'weights': 'distance'}  |
| LR    | Logistic Regression      | {'C': 0.1, 'penalty': 'l2', 'solver': 'liblinear'}                                      |
| RF    | Random Forest            | {'max_depth': 10, 'max_features': 'sqrt', 'min_samples_split': 2, 'n_estimators': 1000} |
| SVM   | Supported Vector Machine | {'C': 1.0, 'gamma': 'scale', 'kernel': 'rbf'}                                           |

**Table S3.** Statistical summary of surface descriptors for all protein data set.

|                                            | s_phobic_avg | s_neg_area_avg | s_pos_area_avg | norm_s_b | FD    | s_bs   | s_do    |
|--------------------------------------------|--------------|----------------|----------------|----------|-------|--------|---------|
| Extracellular Proteins                     |              |                |                |          |       |        |         |
| count                                      | 331          |                |                |          |       |        |         |
| mean                                       | -1.101       | 0.137          | 0.193          | 0.231    | 2.192 | 13.009 | 52.988  |
| std                                        | 0.366        | 0.043          | 0.048          | 0.102    | 0.060 | 9.479  | 12.690  |
| min                                        | -1.998       | 0.024          | 0.061          | -0.049   | 2.066 | 0      | 7.23    |
| 25%                                        | -1.3365      | 0.1135         | 0.1635         | 0.159    | 2.144 | 5.694  | 45.2715 |
| 50%                                        | -1.148       | 0.137          | 0.19           | 0.251    | 2.190 | 11.609 | 54.704  |
| 75%                                        | -0.899       | 0.1605         | 0.221          | 0.298    | 2.235 | 19.968 | 60.874  |
| max                                        | 0.719        | 0.305          | 0.364          | 0.491    | 2.372 | 47.337 | 88.165  |
| Highly Abundant Cytoplasmic (HAC) Proteins |              |                |                |          |       |        |         |
| count                                      | 337          |                |                |          |       |        |         |
| mean                                       | -1.569       | 0.170          | 0.257          | 0.185    | 2.180 | 8.691  | 50.151  |
| std                                        | 0.452        | 0.076          | 0.090          | 0.098    | 0.069 | 8.643  | 16.337  |
| min                                        | -2.74        | 0.022          | 0.031          | -0.02    | 2.045 | 0      | 1       |
| 25%                                        | -1.854       | 0.112          | 0.195          | 0.126    | 2.117 | 2.578  | 39.872  |
| 50%                                        | -1.6         | 0.169          | 0.236          | 0.192    | 2.178 | 6.733  | 48.05   |
| 75%                                        | -1.385       | 0.22           | 0.309          | 0.26     | 2.232 | 12.685 | 58.326  |
| max                                        | 0.294        | 0.555          | 0.495          | 0.512    | 2.325 | 57.663 | 99.187  |

\*Full name of each descriptor:

s\_phobic\_avg: Average Surface Hydrophobicity

s\_neg\_area\_avg: Average Negatively Charged Surface Area

a\_pos\_area\_avg: Average Positively Charged Surface Area

norm\_s\_b: Average Normalized Surface b-factor

FD: Average Surface Roughness

s\_bs: Surface Beta Strands Composition

s\_do: Surface Disordered Regions Composition

**Table S4.** pKa Values used to calculate net charge [51].

| 1-letter code | Amino Acid    | pK <sub>a</sub> Values   |                                                   |                            |
|---------------|---------------|--------------------------|---------------------------------------------------|----------------------------|
|               |               | pK <sub>a1</sub> (-COOH) | pK <sub>a2</sub> (-NH <sub>3</sub> <sup>+</sup> ) | pK <sub>aR</sub> (R group) |
| A             | Alanine       | 2.35                     | 9.87                                              |                            |
| C             | Cysteine      | 2.05                     | 10.25                                             | 8.00                       |
| D             | Aspartic Acid | 2.10                     | 9.82                                              | 3.86                       |
| E             | Glutamic Acid | 2.10                     | 9.47                                              | 4.07                       |
| F             | Phenylalanine | 2.58                     | 9.24                                              |                            |
| G             | Glycine       | 2.35                     | 9.78                                              |                            |
| H             | Histidine     | 1.77                     | 9.18                                              | 6.10                       |
| I             | Isoleucine    | 2.32                     | 9.76                                              |                            |
| K             | Lysine        | 2.18                     | 8.95                                              | 10.53                      |

|   |            |      |       |       |
|---|------------|------|-------|-------|
| L | Leucine    | 2.33 | 9.74  |       |
| M | Methionine | 2.28 | 9.21  |       |
| N | Asparagine | 2.02 | 8.80  |       |
| P | Proline    | 2.00 | 10.60 |       |
| Q | Glutamine  | 2.17 | 9.13  |       |
| R | Arginine   | 2.01 | 9.04  | 12.48 |
| S | Serine     | 2.21 | 9.15  |       |
| T | Threonine  | 2.09 | 9.10  |       |
| V | Valine     | 2.29 | 9.72  |       |
| W | Tryptophan | 2.38 | 9.39  |       |
| Y | Tyrosine   | 2.20 | 9.11  | 10.07 |

Surface net charge was calculated using Table S3 under physiological conditions (pH=7). General expressions derived from Henderson-Hasselbalch equation calculated negative ( $Q^-$ ) and positive ( $Q^+$ ) charge as follows [52]:

$$Q^- = \frac{-1}{1 + 10^{-(pH-pKa)}}$$

$$Q^+ = \frac{1}{1 + 10^{+(pH-pKa)}}$$

Thus, surface net charge of protein was calculated for all the surface residues with the following general expression:

$$Q_{protein} = \sum Q^- + \sum Q^+$$

Where  $Q^-$  includes C-terminus and negatively charged R groups, and  $Q^+$  includes N-terminus and positively charged R groups.
